# Supplementary material for: Software for selecting the most informative sets of genomic loci for multi-target microbial typing
Source: Springer Nature journal article supplement (doi:10.1186/1471-2105-14-148), 2013-05-01
Supplement: 12859_2012_5886_MOESM5_ESM.pdf [file 12859_2012_5886_MOESM5_ESM.pdf]

Step 1:  
Input data

|           | Target A  | Target B  | Target C  | Target D  | Target E  | Target F  |
|-----------|-----------|-----------|-----------|-----------|-----------|-----------|
| Isolate 1 | Result A1 | Result B1 | Result C1 | Result D1 | Result E1 | Result F1 |
| Isolate 2 | Result A2 | Result B2 | Result C1 | Result D1 | Result E3 | Result F3 |
| Isolate 3 | Result A2 | Result B3 | Result C2 | Result D1 | Result E3 | Result F1 |
| ...       | ...       | ...       | ...       | ...       | ...       | ...       |
| Isolate n | Result An | Result Bn | Result Cn | Result D1 | Result En | Result Fn |

Data are arranged with targets in columns and isolates in rows with typing results in cells

Step 2:  
Redundant targets are removed from dataset

|           | Target A  | Target B  | Target C  | Target E  | Target F  |
|-----------|-----------|-----------|-----------|-----------|-----------|
| Isolate 1 | Result A1 | Result B1 | Result C1 | Result E1 | Result F1 |
| Isolate 2 | Result A2 | Result B2 | Result C1 | Result E3 | Result F3 |
| Isolate 3 | Result A2 | Result B3 | Result C2 | Result E3 | Result F1 |
| ...       | ...       | ...       | ...       | ...       | ...       |
| Isolate n | Result An | Result Bn | Result Cn | Result En | Result Fn |

Target D is found to be redundant (results for all isolates is the same) and is removed

Step 3:  
Each target is examined and most informative is selected

|           | Target B  |
|-----------|-----------|
| Isolate 1 | Result B1 |
| Isolate 2 | Result B2 |
| Isolate 3 | Result B3 |
| ...       | ...       |
| Isolate n | Result Bn |

Target B is found to be most informative

Step 4:  
Each remaining target is examined in combination with the current subset and the most informative selected. If a tie occurs, tied combinations selected in parallel

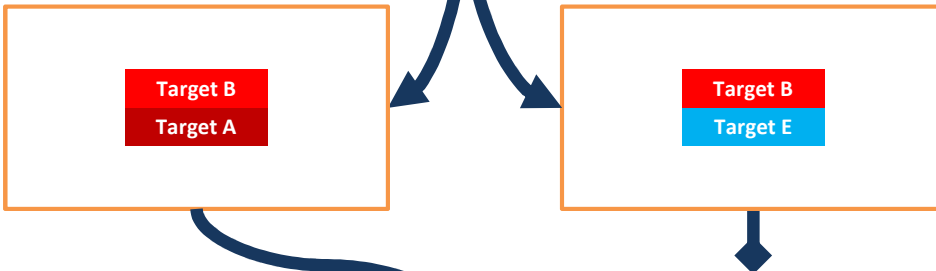

Step 5:  
When a tie occurs, both are examined in parallel until one path is found to be most informative

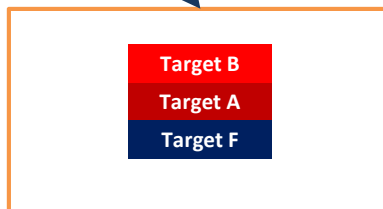

Targets B, A and F are more informative than Targets B, E and F, Targets B, E and A or Targets B, E and C, so the right hand path is abandoned

Step 6:  
Program calculates when threshold is reached and additional targets do not increase informative power

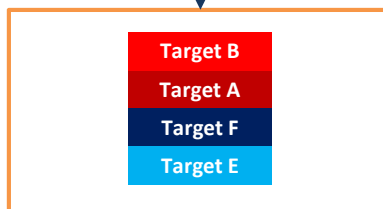

Targets B, A, F and E represents the most informative combination with the fewest number of targets

Step 7:  
Output

Output

Output presented in text and graphical formats
